# Supplementary material for: Catalytic upgrading of ethanol to higher alcohols over nickel-modified Cu–La2O3/Al2O3 catalysts
Source: Royal Society of Chemistry journal article supplement (doi:10.1039/d2cy01554d), 2022-11-07
Supplement: d2cy01554d1.pdf [file d2cy01554d1.pdf]

## *Supporting Information*

### **Catalytic Upgrading of Ethanol to Higher Alcohols over Nickel-Modified Cu-La<sub>2</sub>O<sub>3</sub>/Al<sub>2</sub>O<sub>3</sub> Catalysts**

*Jinfeng He,<sup>a</sup> Xiuzhen Li,<sup>b</sup> Jianyao Kou,<sup>a</sup> Tingjie Tao,<sup>a</sup> Xinyue Shen,<sup>a</sup> Dahao Jiang,<sup>\*a</sup> Lili Lin<sup>a</sup> and Xiaonian Li<sup>a</sup>*

a. Institute of Industrial Catalysis, Zhejiang University of Technology, Hangzhou 310014, China

b. Fujian Runhua Chemical Co., Ltd., Nanping 354003, China

E-mail addresses: [dhjiang@zjut.edu.cn](mailto:dhjiang@zjut.edu.cn) (D.H. Jiang).

## Table of Contents

1. **Guerbet reaction pathway**
2. **Fig. S1. FTIR spectra of CuO/Al<sub>2</sub>O<sub>3</sub> catalysts with different CuO loadings**
3. **Fig. S2. FTIR spectra of NiO/Al<sub>2</sub>O<sub>3</sub> catalysts with different NiO loadings**
4. **Fig. S3. FTIR spectra of NiO-CuO/Al<sub>2</sub>O<sub>3</sub> catalysts with different NiO and CuO loadings**
5. **Table S1. The areas of -OH absorption peaks for CuO/Al<sub>2</sub>O<sub>3</sub> catalysts with different CuO loadings.**
6. **Table S2. The areas of -OH absorption peaks for NiO/Al<sub>2</sub>O<sub>3</sub> catalysts with different NiO loadings.**
7. **Table S3. The areas of -OH absorption peaks for NiO-CuO/Al<sub>2</sub>O<sub>3</sub> catalysts with different NiO and CuO loadings.**
8. **Fig. S4. H<sub>2</sub>-TPR profiles of calcined NiO/Al<sub>2</sub>O<sub>3</sub> and NiO-La<sub>2</sub>O<sub>3</sub>/Al<sub>2</sub>O<sub>3</sub> catalysts**
9. **Fig. S5. La 3d XPS spectra of 0.65%NiO-Cu-La<sub>2</sub>O<sub>3</sub>/Al<sub>2</sub>O<sub>3</sub> catalyst after reaction**
10. **Table S4. XPS analysis of Cu-La<sub>2</sub>O<sub>3</sub>/Al<sub>2</sub>O<sub>3</sub> and 0.65%NiO-Cu-La<sub>2</sub>O<sub>3</sub>/Al<sub>2</sub>O<sub>3</sub> catalysts**
11. **Table S5. Textural parameters and surface properties of NiO-Cu-La<sub>2</sub>O<sub>3</sub>/Al<sub>2</sub>O<sub>3</sub> catalysts**
12. **Fig. S6. Stability evaluation of 0.65%NiO-Cu-La<sub>2</sub>O<sub>3</sub>/Al<sub>2</sub>O<sub>3</sub> catalyst**
13. **Table S6. Catalytic performance of NiO/Al<sub>2</sub>O<sub>3</sub> and NiO-La<sub>2</sub>O<sub>3</sub>/Al<sub>2</sub>O<sub>3</sub> catalysts for ethanol upgrading to higher alcohols**

## 1. Guerbet reaction pathway

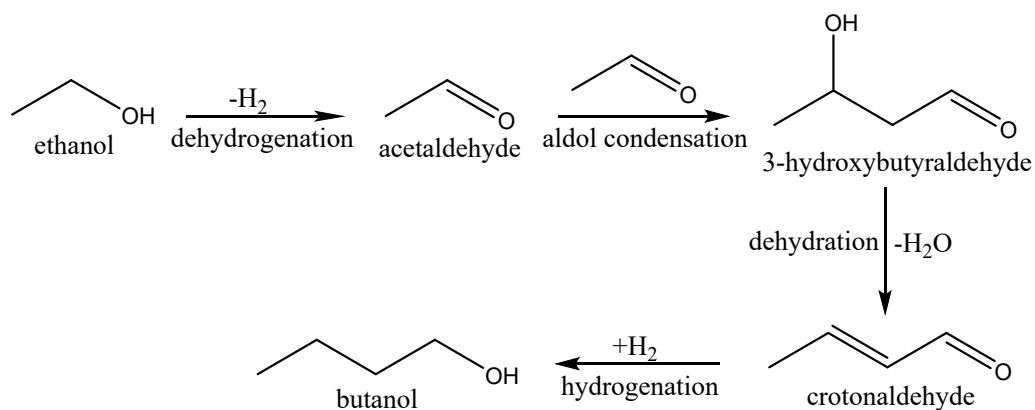

**Scheme S1.** The Guerbet reaction pathway.

## 2. Fig. S1. FTIR spectra of CuO/Al<sub>2</sub>O<sub>3</sub> catalysts with different CuO loadings

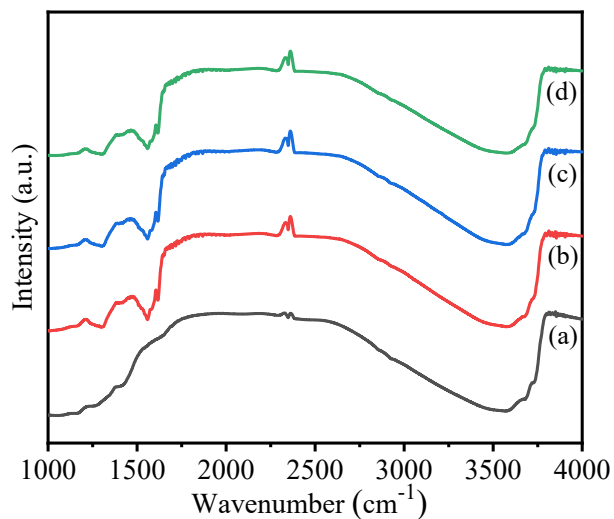

Fig. S1. FTIR spectra of CuO/Al<sub>2</sub>O<sub>3</sub> catalysts with different CuO loadings: (a) Al<sub>2</sub>O<sub>3</sub>; (b) 0.63%CuO/Al<sub>2</sub>O<sub>3</sub>; (c) 1.25%CuO/Al<sub>2</sub>O<sub>3</sub>; (d) 1.88%CuO/Al<sub>2</sub>O<sub>3</sub>.

### 3. Fig. S2. FTIR spectra of NiO/Al<sub>2</sub>O<sub>3</sub> catalysts with different NiO loadings

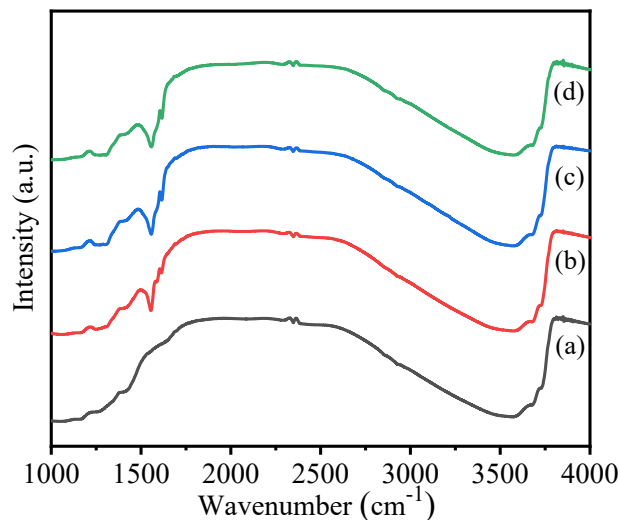

Fig. S2. FTIR spectra of NiO/Al<sub>2</sub>O<sub>3</sub> catalysts with different NiO loadings: (a) Al<sub>2</sub>O<sub>3</sub>; (b) 0.65%NiO/Al<sub>2</sub>O<sub>3</sub>; (c) 1.27%NiO/Al<sub>2</sub>O<sub>3</sub>; (d) 1.91%NiO/Al<sub>2</sub>O<sub>3</sub>.

### 4. Fig. S3. FTIR spectra of NiO-CuO/Al<sub>2</sub>O<sub>3</sub> catalysts with different NiO and CuO loadings

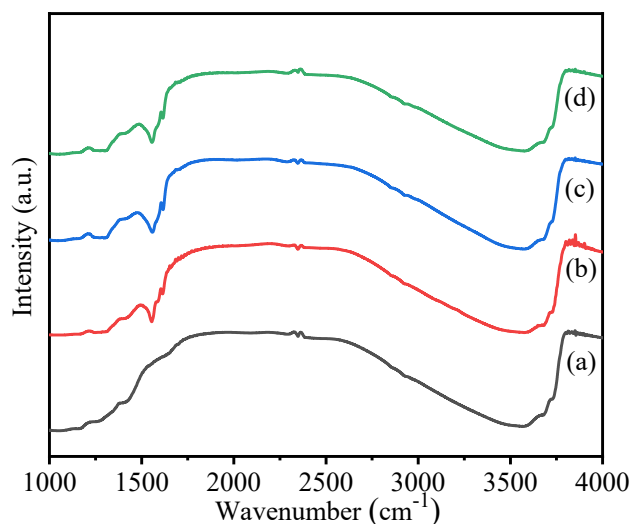

Fig. S3. FTIR spectra of NiO-CuO/Al<sub>2</sub>O<sub>3</sub> catalysts with different NiO and CuO loadings: (a) Al<sub>2</sub>O<sub>3</sub>; (b) 0.32%NiO-0.31%Cu/Al<sub>2</sub>O<sub>3</sub>; (c) 0.65%NiO-0.63%Cu/Al<sub>2</sub>O<sub>3</sub>; (d) 0.97%NiO-0.94%Cu/Al<sub>2</sub>O<sub>3</sub>.

**5. Table S1. The areas of -OH absorption peaks for CuO/Al<sub>2</sub>O<sub>3</sub> catalysts with different CuO loadings.**

**Table S1** The areas of -OH absorption peaks centered at 3600 cm<sup>-1</sup> for Al<sub>2</sub>O<sub>3</sub> support and the CuO/Al<sub>2</sub>O<sub>3</sub> catalysts with different CuO loadings.

| Integral area of IR absorption peak of -OH |                                         |                                         |                                         |
|--------------------------------------------|-----------------------------------------|-----------------------------------------|-----------------------------------------|
| Al <sub>2</sub> O <sub>3</sub>             | 0.63%CuO/Al <sub>2</sub> O <sub>3</sub> | 1.25%CuO/Al <sub>2</sub> O <sub>3</sub> | 1.88%CuO/Al <sub>2</sub> O <sub>3</sub> |
| 63249                                      | 63207                                   | 63184                                   | 51506                                   |

**6. Table S2. The areas of -OH absorption peaks for NiO/Al<sub>2</sub>O<sub>3</sub> catalysts with different NiO loadings.**

**Table S2** The areas of -OH absorption peaks centered at 3600 cm<sup>-1</sup> for Al<sub>2</sub>O<sub>3</sub> support and the NiO/Al<sub>2</sub>O<sub>3</sub> catalysts with different NiO loadings<sup>[a]</sup>.

| Integral area of IR absorption peak of -OH |                                         |                                         |                                         |
|--------------------------------------------|-----------------------------------------|-----------------------------------------|-----------------------------------------|
| Al <sub>2</sub> O <sub>3</sub>             | 0.65%NiO/Al <sub>2</sub> O <sub>3</sub> | 1.27%NiO/Al <sub>2</sub> O <sub>3</sub> | 1.91%NiO/Al <sub>2</sub> O <sub>3</sub> |
| 63249                                      | 63077                                   | 63008                                   | 54734                                   |

[a] The mass fractions of nickel in the NiO/Al<sub>2</sub>O<sub>3</sub> catalysts are respectively equal to those of copper in the corresponding CuO/Al<sub>2</sub>O<sub>3</sub> catalysts in Table S1.

**7. Table S3. The areas of -OH absorption peaks for NiO-CuO/Al<sub>2</sub>O<sub>3</sub> catalysts with different NiO and CuO loadings.**

**Table S3** The areas of -OH absorption peaks centered at 3600 cm<sup>-1</sup> for Al<sub>2</sub>O<sub>3</sub> support and the NiO-CuO/Al<sub>2</sub>O<sub>3</sub> catalysts with different NiO and CuO loadings<sup>[a]</sup>.

| Integral area of IR absorption peak of -OH |                                                  |                                                  |                                                  |
|--------------------------------------------|--------------------------------------------------|--------------------------------------------------|--------------------------------------------------|
| Al <sub>2</sub> O <sub>3</sub>             | 0.32%NiO-0.31%CuO/Al <sub>2</sub> O <sub>3</sub> | 0.65%NiO-0.63%CuO/Al <sub>2</sub> O <sub>3</sub> | 0.97%NiO-0.94%CuO/Al <sub>2</sub> O <sub>3</sub> |
| 63249                                      | 63373                                            | 62808                                            | 53550                                            |

[a] The mass fractions of nickel and copper are remained to be equal in each NiO-CuO/Al<sub>2</sub>O<sub>3</sub> catalyst.

FTIR studies were performed on ThermoFisher Nicolet IS50 instrument (OMNIC software, MCT detector, 64 scans). All catalysts were pressed into 20 mg of self-supporting wafers and mounted into a quartz IR cell with BaF<sub>2</sub> windows. After the catalysts were pretreated at 473 K for 1 h and cooled to desired temperature in a flow of He, FTIR spectra were collected.

FTIR spectra of Al<sub>2</sub>O<sub>3</sub> support, CuO/Al<sub>2</sub>O<sub>3</sub>, NiO/Al<sub>2</sub>O<sub>3</sub> and CuO-NiO/Al<sub>2</sub>O<sub>3</sub> catalysts with different CuO and/or NiO loadings were shown in Fig. S1-S3† and the areas of -OH absorption peaks centered at 3600 cm<sup>-1</sup> for the catalysts and Al<sub>2</sub>O<sub>3</sub> support were displayed in Table S1-S3†. It can be seen that the intensity of the broad adsorption peak centered at 3600 cm<sup>-1</sup> characteristic of stretching vibrations of -OH on surface of the catalysts with different CuO loadings first remained almost unchanged and then decreased when the CuO loading gradually increased from 0 to 1.88%.<sup>1,2</sup> The intensity of the broad adsorption peak characteristic of stretching vibrations of -OH on surface of the catalysts with different NiO loadings showed a similar trend when the NiO loading increased from 0 to 1.91%. These results showed that both CuO and NiO preferentially bonded with the surface coordinatively unsaturated Al<sup>3+</sup> and then bonded with the -OH on the surface of Al<sub>2</sub>O<sub>3</sub> support.<sup>3-5</sup>

## 8. Fig. S4. H<sub>2</sub>-TPR profiles of calcined NiO/Al<sub>2</sub>O<sub>3</sub> and NiO-La<sub>2</sub>O<sub>3</sub>/Al<sub>2</sub>O<sub>3</sub> catalysts

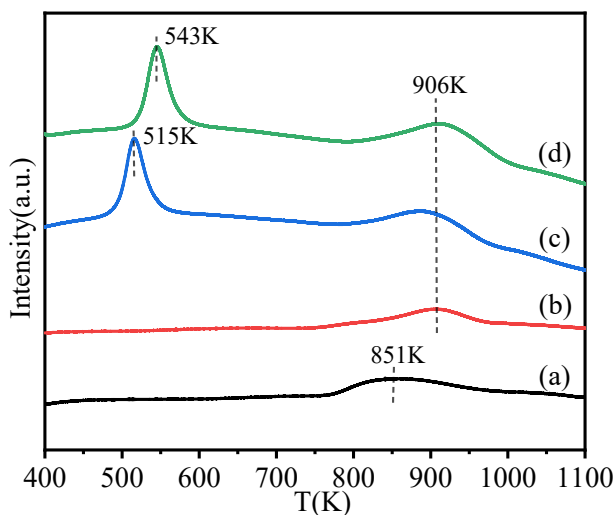

Fig. S4. H<sub>2</sub>-TPR profiles of calcined catalysts: (a) 2.55%NiO/Al<sub>2</sub>O<sub>3</sub>; (b) 2.55%NiO-La<sub>2</sub>O<sub>3</sub>/Al<sub>2</sub>O<sub>3</sub>; (c) Cu-La<sub>2</sub>O<sub>3</sub>/Al<sub>2</sub>O<sub>3</sub>; (d) 2.55NiO-Cu-La<sub>2</sub>O<sub>3</sub>/Al<sub>2</sub>O<sub>3</sub>.

## 9. Fig. S5. La 3d XPS spectra of 0.65%NiO-Cu-La<sub>2</sub>O<sub>3</sub>/Al<sub>2</sub>O<sub>3</sub> catalyst after reaction

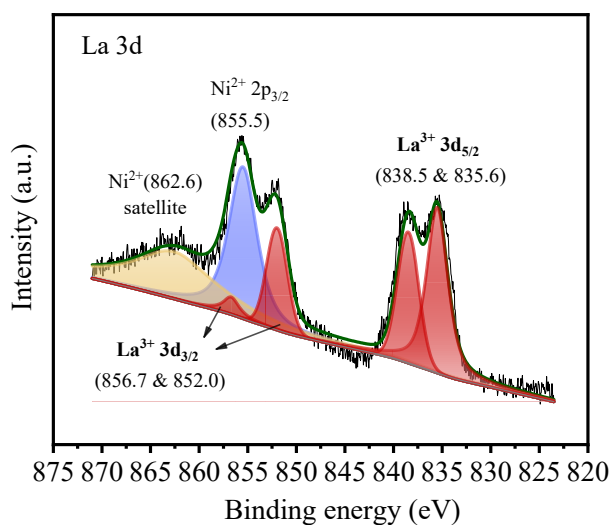

Fig. S5. La 3d XPS spectra of 0.65%NiO-Cu-La<sub>2</sub>O<sub>3</sub>/Al<sub>2</sub>O<sub>3</sub> catalyst after reaction.

## 10. Table S4. XPS analysis of Cu-La<sub>2</sub>O<sub>3</sub>/Al<sub>2</sub>O<sub>3</sub> and 0.65%NiO-Cu-La<sub>2</sub>O<sub>3</sub>/Al<sub>2</sub>O<sub>3</sub> catalysts

Table S4 XPS parameters of Cu-La<sub>2</sub>O<sub>3</sub>/Al<sub>2</sub>O<sub>3</sub> and 0.65%NiO-Cu-La<sub>2</sub>O<sub>3</sub>/Al<sub>2</sub>O<sub>3</sub> catalysts

| Catalyst                                                                   | Cu 2p (eV)        |                   |                   |                   | Ni 2p (eV)        |                   | La 3d (eV)        |                   |                   |                   | O 1s (eV) | Al 2p (eV) |
|----------------------------------------------------------------------------|-------------------|-------------------|-------------------|-------------------|-------------------|-------------------|-------------------|-------------------|-------------------|-------------------|-----------|------------|
|                                                                            | 2p <sub>1/2</sub> | 2p <sub>3/2</sub> | 2p <sub>3/2</sub> | 2p <sub>3/2</sub> | 2p <sub>1/2</sub> | 2p <sub>3/2</sub> | 3d <sub>3/2</sub> | 3d <sub>5/2</sub> | 3d <sub>5/2</sub> | 3d <sub>5/2</sub> |           |            |
| Cu-La <sub>2</sub> O <sub>3</sub> /Al <sub>2</sub> O <sub>3</sub>          | 953.4             | 952.3             | 933.4             | 932.1             | —                 | —                 | 856.8             | 852.1             | 838.4             | 835.6             | 531.1     | 73.9       |
| 0.65%NiO-Cu-La <sub>2</sub> O <sub>3</sub> /Al <sub>2</sub> O <sub>3</sub> | 953.7             | 952.5             | 933.6             | 932.3             | 873.8             | 855.5             | 856.7             | 852.0             | 838.5             | 835.6             | 531.0     | 74.0       |

## 11. Table S5. Textural parameters and surface properties of NiO-Cu-La<sub>2</sub>O<sub>3</sub>/Al<sub>2</sub>O<sub>3</sub> catalysts

**Table S5** Textural parameters and surface properties of NiO-Cu-La<sub>2</sub>O<sub>3</sub>/Al<sub>2</sub>O<sub>3</sub> catalysts.

| Catalyst <sup>[a]</sup>                                                    | S <sub>BET</sub><br>(m <sup>2</sup> /g) | V <sub>t</sub> <sup>[b]</sup><br>(cm <sup>3</sup> /g) | D <sub>pore</sub> <sup>[c]</sup><br>(nm) | Total acidity<br>(mmol·g <sup>-1</sup> ) | Acidity distribution<br>(mmol·g <sup>-1</sup> )                   |        |        | Total<br>basicity<br>(mmol·g <sup>-1</sup> ) | Basicity distribution<br>(mmol·g <sup>-1</sup> ) |        |        |
|----------------------------------------------------------------------------|-----------------------------------------|-------------------------------------------------------|------------------------------------------|------------------------------------------|-------------------------------------------------------------------|--------|--------|----------------------------------------------|--------------------------------------------------|--------|--------|
|                                                                            |                                         |                                                       |                                          |                                          | Weak                                                              | medium | strong |                                              | Weak                                             | medium | strong |
|                                                                            |                                         |                                                       |                                          |                                          | Cu-La <sub>2</sub> O <sub>3</sub> /Al <sub>2</sub> O <sub>3</sub> | 155.7  | 0.53   |                                              | 12.7                                             | 1.65   | 1.13   |
| 0.32%NiO-Cu-La <sub>2</sub> O <sub>3</sub> /Al <sub>2</sub> O <sub>3</sub> | 167.4                                   | 0.57                                                  | 12.9                                     | 1.48                                     | 0.99                                                              | 0.39   | 0.10   | 0.77                                         | 0.12                                             | 0.12   | 0.53   |
| 0.65%NiO-Cu-La <sub>2</sub> O <sub>3</sub> /Al <sub>2</sub> O <sub>3</sub> | 173.6                                   | 0.57                                                  | 12.4                                     | 1.33                                     | 0.95                                                              | 0.31   | 0.07   | 0.84                                         | 0.13                                             | 0.10   | 0.61   |
| 1.27%NiO-Cu-La <sub>2</sub> O <sub>3</sub> /Al <sub>2</sub> O <sub>3</sub> | 166.6                                   | 0.57                                                  | 12.9                                     | —                                        | —                                                                 | —      | —      | —                                            | —                                                | —      | —      |
| 2.55%NiO-Cu-La <sub>2</sub> O <sub>3</sub> /Al <sub>2</sub> O <sub>3</sub> | 165.5                                   | 0.56                                                  | 12.9                                     | 1.38                                     | 0.92                                                              | 0.40   | 0.06   | 0.78                                         | 0.14                                             | 0.12   | 0.52   |

[a] The Cu loadings of all the catalysts were fixed at 6wt% and the Cu/La molar ratios were 3:1.5; [b] Single point pore volume at P/P<sub>0</sub>=0.99; [c] The average pore diameters (DFT method).

## 12. Fig. S6. Stability evaluation of 0.65%NiO-Cu-La<sub>2</sub>O<sub>3</sub>/Al<sub>2</sub>O<sub>3</sub> catalyst

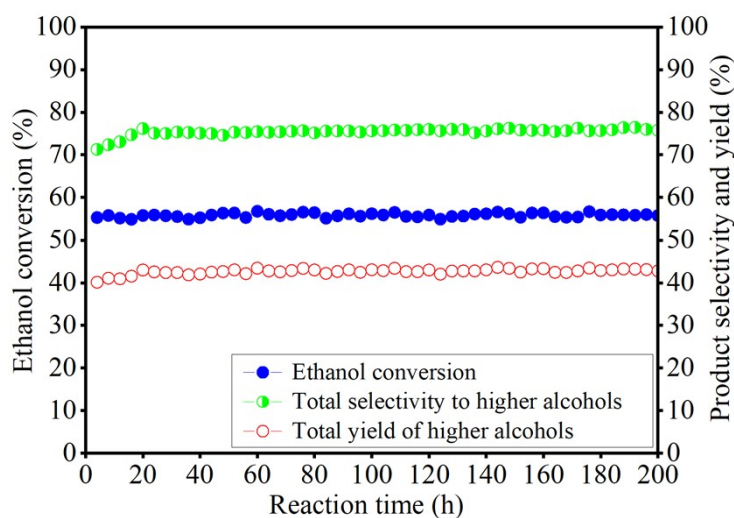

Fig. S6. Stability evaluation of 0.65%NiO-Cu-La<sub>2</sub>O<sub>3</sub>/Al<sub>2</sub>O<sub>3</sub> catalyst.



### 13. Table S6. Catalytic performance of NiO/Al<sub>2</sub>O<sub>3</sub> and NiO-La<sub>2</sub>O<sub>3</sub>/Al<sub>2</sub>O<sub>3</sub> catalysts for upgrading ethanol to higher alcohols

**Table S6.** Catalytic performance of NiO/Al<sub>2</sub>O<sub>3</sub> and NiO-La<sub>2</sub>O<sub>3</sub>/Al<sub>2</sub>O<sub>3</sub> catalysts for ethanol upgrading to higher alcohols<sup>[a]</sup>

| Catalysts                                                               | Conversion (%) | Selectivity (%) |                       | Liquid yield (%) |
|-------------------------------------------------------------------------|----------------|-----------------|-----------------------|------------------|
|                                                                         |                | Ethyl ether     | Others <sup>[b]</sup> |                  |
| 0.65%NiO/Al <sub>2</sub> O <sub>3</sub>                                 | 12.5           | 100             | 0                     | 99.5             |
| 0.65%NiO-La <sub>2</sub> O <sub>3</sub> /Al <sub>2</sub> O <sub>3</sub> | 4.6            | 100             | 0                     | 99.4             |

[a] Conversion and selectivity are obtained at steady-state; reaction conditions: catalyst, 1.0 g; 523 K, 3 MPa (N<sub>2</sub>), LHSV=2 ml/(g<sub>cat</sub>·h), N<sub>2</sub>/ethanol(v/v)=250:1. [b] Other products include acetaldehyde, butyraldehyde, ethyl acetate, n-butanol, etc.

### References

1. M. I. Zaki and H. Knözinger, *Mater. Chem. Phys.*, 1987, **17**, 201-215.
2. F. Wang, J. Z. Ma, S. H. Xin, Q. Wang, J. Xu, C. B. Zhang, H. He and X. C. Zeng, *Nat. Commun.*, 2020, **11**, 529.
3. E. Borello, A. Cimino, G. Ghiotti, M. Lo Jacono, M. Schiavello and A. Zecchina, *Discuss. Faraday Soc.*, 1971, **52**, 149-160.
4. C. Zhao, Y. Z. Yu, A. Jentys and J. A. Lercher, *Appl. Catal., B*, 2013, **132**, 282-292.
5. Y. M. Zhang, Y. Zu, D. D. He, J. Liang, L. H. Zhu, Y. Mei and Y. M. Luo, *Appl. Catal., B*, 2022, **315**, 121539.
